# Supplementary material
Source: HighWire-hosted journal article supplement (https://www.annfammed.org/highwire/filestream/661/field_highwire_adjunct_files/0/Mercer_Supp_Apps.pdf)
Supplement: Mercer_Supp_Apps.pdf [file Mercer_Supp_Apps.pdf]

## Supplemental materials for

Mercer SW, Fitzpatrick B, Grant L, Chng N, McConnachie A, Bakhshi A, James-Rae G, O'Donnell CA, Wyke S. Effectiveness of community-links practitioners in areas of high socioeconomic deprivation. *Ann Fam Med*. 2019;17(6):518-525.

**Table S1. Theories of Change Glasgow Deep End Links Worker Programme**

| Resources                                                                         | Activities                                                                                                                                                                                                                                                                                                                                         | Short term outcomes                                                                                                                                                                                                                                                      | Medium term outcomes                                                                                                                                                                                                                                                              | Long term outcomes                                                                       |
|-----------------------------------------------------------------------------------|----------------------------------------------------------------------------------------------------------------------------------------------------------------------------------------------------------------------------------------------------------------------------------------------------------------------------------------------------|--------------------------------------------------------------------------------------------------------------------------------------------------------------------------------------------------------------------------------------------------------------------------|-----------------------------------------------------------------------------------------------------------------------------------------------------------------------------------------------------------------------------------------------------------------------------------|------------------------------------------------------------------------------------------|
| Practice Development Fund (mainly spend on staff time to create enhanced systems) | <p>Patient level</p> <ul style="list-style-type: none"> <li>• One-to-one working with patients, mainly by CLPs</li> <li>• Recommend, signpost, refer to, and support patient to make use of, community resources.</li> <li>• Frequency and duration of meetings not specified (individualised to patient need).</li> </ul>                         | <p>Patient level</p> <ul style="list-style-type: none"> <li>• Improved ability to use available skills, information and support</li> </ul>                                                                                                                               | <p>Patient level</p> <ul style="list-style-type: none"> <li>• Increased ability to self-manage health conditions and navigate systems.</li> <li>• Improved wellbeing and sense of being valued as a 'whole person'.</li> <li>• Improve relationships with professional</li> </ul> | <p>Patient level</p> <p>More people supported to live well with good quality of life</p> |
| Community Links Practitioner                                                      | <p>Practice level</p> <ul style="list-style-type: none"> <li>• Shared learning and awareness of community resources available for patients.</li> <li>• Practice specific referral systems between general practitioners, practice nurses and community links practitioners</li> <li>• Redeployment of staff to support 'links' approach</li> </ul> | <p>Practice level</p> <ul style="list-style-type: none"> <li>• Practice staff have improved understanding of social/personal context of illness</li> <li>• Practice staff have improved awareness of range of resources available to patients in a local area</li> </ul> | <p>Practice level</p> <ul style="list-style-type: none"> <li>• Practice staff have skills in identifying and supporting those experiencing barriers to accessing resources.</li> <li>• Practice staff have sufficient time to listen and advice patients effectively</li> </ul>   | <p>Health services addressing health Inequalities</p>                                    |
| Programme clinical and management support                                         | <p>Community level</p> <ul style="list-style-type: none"> <li>• Activities to build relationships between practice and local community organisations.</li> <li>• Developing referral pathways.</li> <li>• Events to consolidate enable shared learning between practice and community organisations.</li> </ul>                                    | <p>Community level</p> <ul style="list-style-type: none"> <li>• Stronger practice-community organisation relationships</li> <li>• Established cross-sectoral referral pathways</li> </ul>                                                                                | <p>Community level</p> <ul style="list-style-type: none"> <li>• Creation and sustaining of a more community-orientated practice identity.</li> <li>• Practice seen as a 'community hub'.</li> </ul>                                                                               |                                                                                          |

Supplemental Figure 1(a). Achieved Intervention Practice Study Patient Numerator

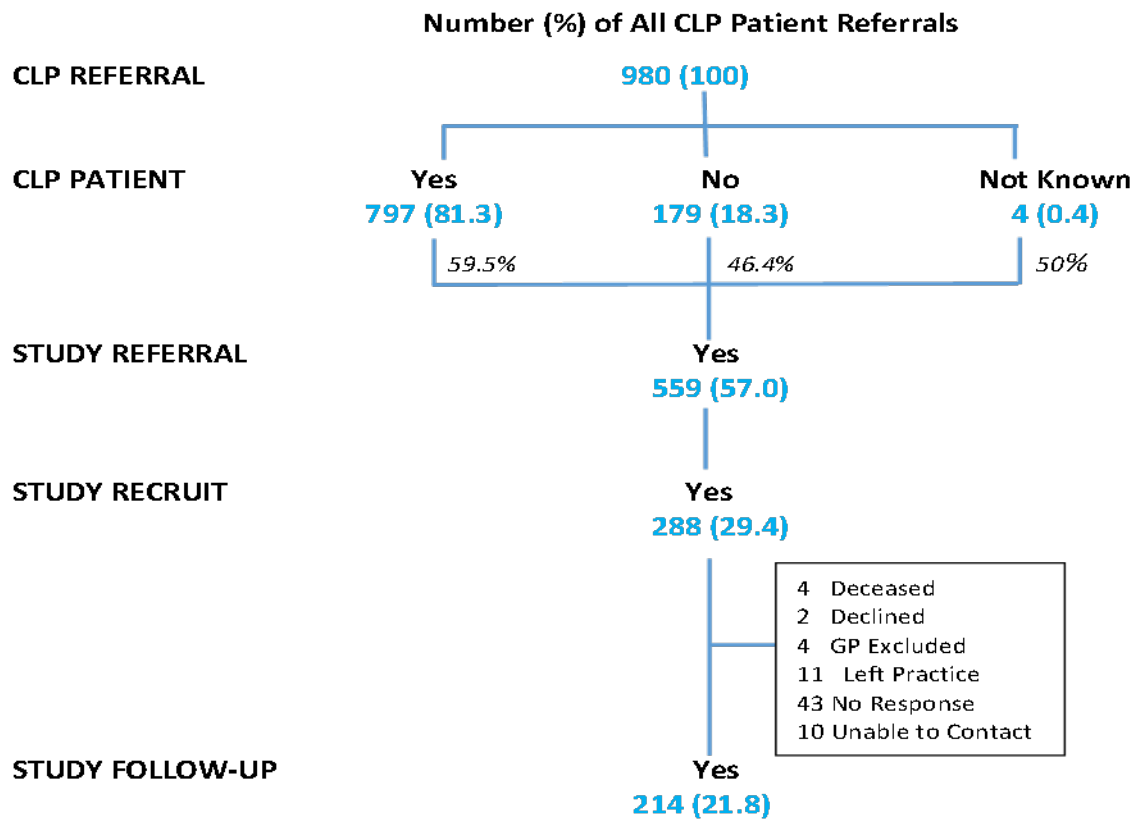

**Supplemental Figure 1(b). Achieved Comparison Practice Study Patient Numerator (n,%)**

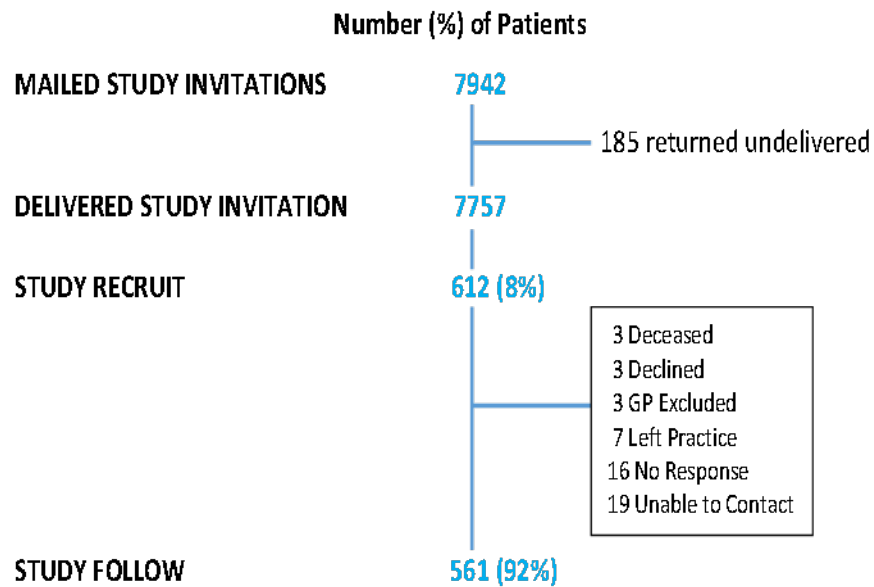

**Supplemental Table 2. Characteristics of Patients in Intervention Practices Referred to, Recruited and Followed-Up by, the Study Compared to the Programme Patient Denominator (n,%, mean)**

| <b>INTERVENTION PRACTICE PATIENT STUDY POPULATION</b> | <b>CHARACTERISTIC</b>         |                         |                         |                                             |                                            |
|-------------------------------------------------------|-------------------------------|-------------------------|-------------------------|---------------------------------------------|--------------------------------------------|
|                                                       | <b>Female</b>                 | <b>Age (years)</b>      | <b>SIMD Score</b>       | <b>Number of Recorded Referral Problems</b> | <b>Number of Recorded Referral Domains</b> |
|                                                       | <b>Number (%)<br/>p value</b> | <b>Mean<br/>p value</b> | <b>Mean<br/>p value</b> | <b>Mean<br/>p value</b>                     | <b>Mean<br/>p value</b>                    |
| Denominator                                           | 580 (59.2)                    | 46.43                   | 800.31                  | 2.03                                        | 1.45                                       |
| Patient Referrals                                     | 351 (62.8)<br>0.008           | 46.41<br>0.978          | 817.95<br>0.564         | 2.02<br>0.623                               | 1.44<br>0.866                              |
| Patient Recruits                                      | 176 (61.1)<br>0.428           | 48.28<br>0.018          | 869.24<br>0.210         | 1.98<br>0.328                               | 1.42<br>0.419                              |
| Patient Follow-Ups                                    | 129 (60.3)<br>0.712           | 50.01<br>0.000          | 944.07<br>0.057         | 1.99<br>0.562                               | 1.40<br>0.238                              |

**Supplemental Table 3: Patients' frequency of individuals with each medical morbidity conditions at baseline, by randomised group**

|                          | All<br>900  | Comparator<br>612 | Intervention<br>288 | p-value |
|--------------------------|-------------|-------------------|---------------------|---------|
| High Blood Pressure      | 314 (34.9%) | 210 (34.3%)       | 104 (36.1%)         | p=0.601 |
| Stroke/mini-stroke       | 65 (7.2%)   | 45 (7.4%)         | 20 (6.9%)           | p=0.891 |
| Diabetes                 | 78 (8.7%)   | 49 (8.0%)         | 29 (10.1%)          | p=0.311 |
| Angina/Heart Attack      | 70 (7.8%)   | 49 (8.0%)         | 21 (7.3%)           | p=0.790 |
| Heart Failure            | 9 (1.0%)    | 5 (0.8%)          | 4 (1.4%)            | p=0.478 |
| Anxiety/Depression       | 438 (48.7%) | 220 (35.9%)       | 218 (75.7%)         | p<0.001 |
| Arthritis                | 246 (27.3%) | 174 (28.4%)       | 72 (25.0%)          | p=0.298 |
| Back Problems            | 262 (29.1%) | 167 (27.3%)       | 95 (33.0%)          | p=0.084 |
| Thyroid Problem          | 53 (5.9%)   | 40 (6.5%)         | 13 (4.5%)           | p=0.288 |
| Eczema/Psoriasis         | 112 (12.4%) | 74 (12.1%)        | 38 (13.2%)          | p=0.665 |
| Liver Disease            | 26 (2.9%)   | 11 (1.8%)         | 15 (5.2%)           | p=0.009 |
| Kidney Disease           | 27 (3.0%)   | 20 (3.3%)         | 7 (2.4%)            | p=0.676 |
| Asthma                   | 181 (20.1%) | 101 (16.5%)       | 80 (27.8%)          | p<0.001 |
| Chronic Bronchitis       | 51 (5.7%)   | 21 (3.4%)         | 30 (10.4%)          | p<0.001 |
| Migraine                 | 114 (12.7%) | 62 (10.1%)        | 52 (18.1%)          | p=0.001 |
| Cancer                   | 46 (5.1%)   | 36 (5.9%)         | 10 (3.5%)           | p=0.145 |
| Irritable Bowel Syndrome | 135 (15.0%) | 88 (14.4%)        | 47 (16.3%)          | p=0.484 |
| Other                    | 108 (12.0%) | 64 (10.5%)        | 44 (15.3%)          | p=0.047 |

p values based on Fisher's exact Test

**Supplemental Table 4: Patients' frequency of individuals with each social morbidity conditions at baseline, by randomised group**

|                                               | All<br>900  | Comparator<br>612 | Intervention<br>288 | p-value              |
|-----------------------------------------------|-------------|-------------------|---------------------|----------------------|
| Partner, family or close friends              | 278 (30.9%) | 162 (26.5%)       | 116 (40.3%)         | p<0.001 <sup>F</sup> |
| Housing condition                             | 130 (14.4%) | 54 (8.8%)         | 76 (26.4%)          | p<0.001 <sup>F</sup> |
| Conditions at current job                     | 106 (11.8%) | 69 (11.3%)        | 37 (12.8%)          | p=0.507 <sup>F</sup> |
| Weight                                        | 347 (38.6%) | 209 (34.2%)       | 138 (47.9%)         | p<0.001 <sup>F</sup> |
| Alcohol/Illegal drug level                    | 77 (8.6%)   | 32 (5.2%)         | 45 (15.6%)          | p<0.001 <sup>F</sup> |
| Opportunities to socialise                    | 195 (21.7%) | 67 (10.9%)        | 128 (44.4%)         | p<0.001 <sup>F</sup> |
| Ability to access suitable exercise           | 133 (14.8%) | 70 (11.4%)        | 63 (21.9%)          | p<0.001 <sup>F</sup> |
| Neighbours                                    | 68 (7.6%)   | 39 (6.4%)         | 29 (10.1%)          | p=0.058 <sup>F</sup> |
| Ability to find a suitable job                | 106 (11.8%) | 43 (7.0%)         | 63 (21.9%)          | p<0.001 <sup>F</sup> |
| Financial situation                           | 220 (24.4%) | 109 (17.8%)       | 111 (38.5%)         | p<0.001 <sup>F</sup> |
| Smoking Level                                 | 120 (13.3%) | 58 (9.5%)         | 62 (21.5%)          | p<0.001 <sup>F</sup> |
| Role/responsibilities as a carer              | 90 (10.0%)  | 50 (8.2%)         | 40 (13.9%)          | p=0.009 <sup>F</sup> |
| Ability to cope with a bereavement            | 146 (16.2%) | 61 (10.0%)        | 85 (29.5%)          | p<0.001 <sup>F</sup> |
| Ability to access suitable leisure facilities | 100 (11.1%) | 47 (7.7%)         | 53 (18.4%)          | p<0.001 <sup>F</sup> |
| Other                                         | 77 (8.6%)   | 42 (6.9%)         | 35 (12.2%)          | p=0.010 <sup>F</sup> |

p values based on Fisher's exact Test

**Supplemental Table 5: Patients' demographic and Socio-economic characteristics at baseline, intervention group, by whether CLP seen before baseline**

|                                          | All         | Yes         | No          | p-value               |
|------------------------------------------|-------------|-------------|-------------|-----------------------|
| <b>Age (years)</b>                       |             |             |             |                       |
| N (N Missing)                            | 288 (0)     | 124 (0)     | 159 (0)     | p=0.731 <sup>KW</sup> |
| Mean (sd)                                | 49 (15)     | 49 (14)     | 50 (15)     |                       |
| Median (IQR)                             | 50 (37, 57) | 50 (39, 57) | 51 (36, 58) |                       |
| Min , Max                                | 21, 92      | 21, 91      | 21, 92      |                       |
| <b>Sex</b>                               |             |             |             |                       |
| N (N Missing)                            | 288 (0)     | 124 (5)     | 159 (5)     | p=0.624 <sup>F</sup>  |
| N (%) Male                               | 112 (38.9%) | 51 (41.1%)  | 60 (37.7%)  |                       |
| N (%) Female                             | 176 (61.1%) | 73 (58.9%)  | 99 (62.3%)  |                       |
| <b>Deprivation category (decile)</b>     |             |             |             |                       |
| N (N Missing)                            | 281 (7)     | 122 (7)     | 154 (10)    | p=0.304 <sup>F</sup>  |
| N (%) 1 (MD)                             | 176 (62.6%) | 75 (61.5%)  | 98 (63.6%)  |                       |
| N (%) 2                                  | 47 (16.7%)  | 17 (13.9%)  | 30 (19.5%)  |                       |
| N (%) 3 to 5                             | 45 (16.0%)  | 24 (19.7%)  | 19 (12.3%)  |                       |
| N (%) 6 to 10 (LD)                       | 13 (4.6%)   | 6 (4.9%)    | 7 (4.5%)    |                       |
| <b>Employment status</b>                 |             |             |             |                       |
| N (N Missing)                            | 282 (6)     | 124 (5)     | 153 (11)    | p=0.230 <sup>F</sup>  |
| N (%) Emp_FT                             | 46 (16.3%)  | 26 (21.0%)  | 19 (12.4%)  |                       |
| N (%) Emp_PT                             | 22 (7.8%)   | 11 (8.9%)   | 10 (6.5%)   |                       |
| N (%) Unemp_SW                           | 28 (9.9%)   | 9 (7.3%)    | 19 (12.4%)  |                       |
| N (%) Unemp_UnFtToW                      | 138 (48.9%) | 58 (46.8%)  | 77 (50.3%)  |                       |
| N (%) Carer                              | 13 (4.6%)   | 6 (4.8%)    | 7 (4.6%)    |                       |
| N (%) Retired                            | 31 (11.0%)  | 11 (8.9%)   | 20 (13.1%)  |                       |
| N (%) Other                              | 4 (1.4%)    | 3 (2.4%)    | 1 (0.7%)    |                       |
| <b>Living arrangement</b>                |             |             |             |                       |
| N (N Missing)                            | 280 (8)     | 123 (6)     | 152 (12)    | p=0.301 <sup>F</sup>  |
| N (%) Live with partner or spouse        | 91 (32.5%)  | 44 (35.8%)  | 45 (29.6%)  |                       |
| N (%) Do not live with partner or spouse | 189 (67.5%) | 79 (64.2%)  | 107 (70.4%) |                       |
| <b>Language spoken at home</b>           |             |             |             |                       |
| N (N Missing)                            | 278 (10)    | 120 (9)     | 153 (11)    | p=1.000 <sup>F</sup>  |
| N (%) English                            | 272 (97.8%) | 117 (97.5%) | 150 (98.0%) |                       |
| N (%) Other                              | 6 (2.2%)    | 3 (2.5%)    | 3 (2.0%)    |                       |

M: Mann-Whitney-Wilcoxon Test; F: Fisher's exact Test; KW: Kruskal-Wallis Test



**Supplemental Table 6: Patients' health and Wellbeing measures at baseline, intervention group, by whether CLP seen before baseline**

|                                                                                             | All                  | Yes                  | No                   | p-value               |
|---------------------------------------------------------------------------------------------|----------------------|----------------------|----------------------|-----------------------|
| <b>Multi-Morbidity (Minimum possible=0; Maximum possible=18)</b>                            |                      |                      |                      |                       |
| N (N Missing)                                                                               | 288 (0)              | 124 (0)              | 159 (0)              | p=0.122 <sup>KW</sup> |
| Mean (sd)                                                                                   | 3.1 (2.1)            | 2.9 (1.9)            | 3.3 (2.2)            |                       |
| Median (IQR)                                                                                | 3.0 (2.0, 4.0)       | 3.0 (1.0, 4.0)       | 3.0 (2.0, 5.0)       |                       |
| Min , Max                                                                                   | 0.0, 10.0            | 0.0, 9.0             | 0.0, 10.0            |                       |
| <b>Social-Morbidity (Minimum possible=0; Maximum possible=15)</b>                           |                      |                      |                      |                       |
| N (N Missing)                                                                               | 288 (0)              | 124 (0)              | 159 (0)              | p=0.840 <sup>KW</sup> |
| Mean (sd)                                                                                   | 3.8 (2.5)            | 3.8 (2.8)            | 3.6 (2.3)            |                       |
| Median (IQR)                                                                                | 3.0 (2.0, 5.0)       | 3.5 (2.0, 5.0)       | 3.0 (2.0, 5.0)       |                       |
| Min , Max                                                                                   | 0.0, 14.0            | 0.0, 14.0            | 0.0, 10.0            |                       |
| <b>Work and social-Adjustment (Best possible=0, Poorest possible=40)</b>                    |                      |                      |                      |                       |
| N (N Missing)                                                                               | 259 (29)             | 108 (16)             | 146 (13)             | p=0.527 <sup>KW</sup> |
| Mean (sd)                                                                                   | 22.3 (12.2)          | 21.5 (12.8)          | 22.7 (11.9)          |                       |
| Median (IQR)                                                                                | 24.0 (12.5, 32.5)    | 22.5 (11.0, 32.2)    | 25.0 (14.0, 32.8)    |                       |
| Min , Max                                                                                   | 0.0, 40.0            | 0.0, 40.0            | 0.0, 40.0            |                       |
| <b>EQ-5D (Best possible health condition=1, Poorest possible health condition=-0.549)</b>   |                      |                      |                      |                       |
| N (N Missing)                                                                               | 277 (11)             | 122 (2)              | 150 (9)              | p=0.240 <sup>KW</sup> |
| Mean (sd)                                                                                   | 0.382 (0.337)        | 0.408 (0.334)        | 0.358 (0.337)        |                       |
| Median (IQR)                                                                                | 0.378 (0.103, 0.664) | 0.408 (0.130, 0.694) | 0.351 (0.087, 0.650) |                       |
| Min , Max                                                                                   | -0.390, 1.000        | -0.245, 1.000        | -0.390, 1.000        |                       |
| <b>ICE-CAP_A (Best possible quality of life=1, Poorest possible quality of life=-0.001)</b> |                      |                      |                      |                       |
| N (N Missing)                                                                               | 281 (7)              | 120 (4)              | 157 (2)              | p=0.498 <sup>KW</sup> |
| Mean (sd)                                                                                   | 0.563 (0.228)        | 0.575 (0.225)        | 0.555 (0.232)        |                       |
| Median (IQR)                                                                                | 0.536 (0.401, 0.703) | 0.573 (0.431, 0.740) | 0.536 (0.371, 0.685) |                       |
| Min , Max                                                                                   | 0.047, 1.000         | 0.119, 1.000         | 0.047, 1.000         |                       |
| <b>HADS Anxiety (Best possible score=0, Poorest possible score=21)</b>                      |                      |                      |                      |                       |
| N (N Missing)                                                                               | 276 (12)             | 119 (5)              | 152 (7)              | p=0.778 <sup>KW</sup> |
| Mean (sd)                                                                                   | 12.7 (4.7)           | 12.7 (4.9)           | 12.7 (4.5)           |                       |
| Median (IQR)                                                                                | 13.0 (10.0, 16.0)    | 14.0 (9.0, 17.0)     | 13.0 (10.0, 16.0)    |                       |
| Min , Max                                                                                   | 0.0, 21.0            | 1.0, 21.0            | 0.0, 20.0            |                       |
| <b>HADS Depression (Best possible score=0, Poorest possible score=21)</b>                   |                      |                      |                      |                       |
| N (N Missing)                                                                               | 280 (8)              | 121 (3)              | 154 (5)              | p=0.912 <sup>KW</sup> |
| Mean (sd)                                                                                   | 11.2 (4.6)           | 11.2 (4.3)           | 11.2 (4.8)           |                       |
| Median (IQR)                                                                                | 11.0 (8.0, 14.0)     | 11.0 (8.0, 14.0)     | 11.5 (8.0, 14.8)     |                       |
| Min , Max                                                                                   | 0.0, 21.0            | 1.0, 21.0            | 0.0, 21.0            |                       |

M: Mann-Whitney-Wilcoxon Test; F: Fisher's exact Test; KW: Kruskal-Wallis Test
